# Supplementary material for: Viral Transport Media (VTM) Pooling To Scale-Up COVID-19 Diagnostics: Resource Optimization at Population Level Screening
Source: Research Square preprint supplement (doi:10.21203/rs.3.rs-728575/v1), 2021-08-09
Supplement: Supplementary file 1 [file 0d4acf9df7560877fb194087.xlsx]

## Sheet: Sheet1
S. No.	Biological replicate set	Ct Group	NIV kit				TaqMan-based commercial kit
			E	RNASE P (IC)	RDRP	ORF1B	ORF1AB	Human β–actin (IC)	Ct values category
1	A	High-V. High	32	32	NA	35	NA	NA	H
2	A	High-V. High	31	28	NA	32	NA	NA	H
3	A	High-V. High	30	29.4	NA	31.8	NA	NA	H
4	A	High-V. High	29	30	35	31.3	NA	NA	H
5	A	High-V. High	20.8	43.3	NA	31.1	NA	NA	H
6	A	High-V. High	20.1	35.2	NA	34.6	NA	NA	H
7	A	High-V. High	19.5	37.6	NA	33.1	NA	NA	H
8	A	High-V. High	31.4	33.1	NA	33	31.7	30.8	H
9	A	High-V. High	32	32	NA	34	32.5	28.2	H
10	A	High-V. High	38.6	34.4	NA	NA	36.3	28.5	V
11	A	High-V. High	42	32	NA	NA	37.7	29.1	V
12	B	High-V. High	32	34	NA	34	NA	NA	H
13	B	High-V. High	31	32	32	30	NA	NA	H
14	B	High-V. High	31	31	NA	31	NA	NA	H
15	B	High-V. High	30	32.9	NA	33.6	NA	NA	H
16	B	High-V. High	29.6	32	NA	32.2	NA	NA	H
17	B	High-V. High	31.2	26	NA	31.8	NA	NA	H
18	B	High-V. High	28	36	32	31	NA	NA	H
19	B	High-V. High	27.7	28.3	NA	31.4	NA	NA	H
20	B	High-V. High	30.5	33.6	36.1	39.4	NA	NA	V
21	B	High-V. High	NA	24.5	NA	NA	36.9	21.1	V
22	B	High-V. High	40.5	30.2	NA	NA	37.7	28.3	V
23	C	Low-Moderate	20	NA	24	21	NA	NA	L
24	C	Low-Moderate	20.7	33	27.2	21.2	NA	NA	L
25	C	Low-Moderate	24.1	18.7	18.1	27.2	NA	NA	L
26	C	Low-Moderate	21	21	27	25	NA	NA	L
27	C	Low-Moderate	22.4	26.9	28.4	23.8	NA	NA	L
28	C	Low-Moderate	21	29	24	23	NA	NA	L
29	C	Low-Moderate	21.4	31.3	25.7	23.7	NA	NA	L
30	C	Low-Moderate	25	30	30	28	NA	NA	M
31	C	Low-Moderate	25.3	28	30.1	28.4	NA	NA	M
32	C	Low-Moderate	24.7	30.2	29.7	27.6	NA	NA	M
33	C	Low-Moderate	23.3	26.8	28.7	25.6	NA	NA	M
34	C	Low-Moderate	25.2	27.3	29.9	27.1	NA	NA	M
35	C	Low-Moderate	24.3	28.9	29.2	26.5	NA	NA	M
36	C	Low-Moderate	27.9	29.7	28.2	31.1	NA	NA	M
37	C	Low-Moderate	27.3	25.9	32.8	29.4	NA	NA	M
38	C	Low-Moderate	26.2	27.4	NA	30.3	NA	NA	M
39	C	Low-Moderate	26.9	29.3	30.5	27.4	NA	NA	M
40	C	Low-Moderate	24.1	25.8	27.1	25.9	NA	NA	M
42	D	Low-Moderate	22	NA	28	25	NA	NA	L
43	D	Low-Moderate	24	NA	31	25	NA	NA	L
44	D	Low-Moderate	23	32	29	24	NA	NA	L
45	D	Low-Moderate	19.2	31.8	22.3	21	NA	NA	L
46	D	Low-Moderate	18	44.8	21.5	20.1	NA	NA	L
47	D	Low-Moderate	20.4	31.7	23	22.3	NA	NA	L
48	D	Low-Moderate	19.8	31.7	23.1	20.5	NA	NA	L
49	D	Low-Moderate	25.3	30.7	28.8	27.9	NA	NA	M
50	D	Low-Moderate	24.9	27.9	31.8	26.5	NA	NA	M
51	D	Low-Moderate	25	26.8	NA	28.2	NA	NA	M
52	D	Low-Moderate	27.5	34.7	36.4	28.4	NA	NA	M
53	D	Low-Moderate	26.3	35.4	27.2	26.3	NA	NA	M
54	D	Low-Moderate	26.8	25.2	29.9	29.8	NA	NA	M
55	D	Low-Moderate	27.3	NA	30.4	29.5	NA	NA	M
56	D	Low-Moderate	25.7	30.1	NA	29.4	NA	NA	M
57	D	Low-Moderate	22.8	NA	39.4	26	NA	NA	M
58	D	Low-Moderate	25.9	29.1	30.7	26.4	NA	NA	M
59	D	Low-Moderate	24.4	30.8	NA	27.5	NA	NA	M
60	D	Low-Moderate	26.5	31.1	30.4	28.6	NA	NA	M
